# Supplementary material for: Active Antioxidant Phenolics from Brazilian Red Propolis: An Optimization Study for Their Recovery and Identification by LC-ESI-QTOF-MS/MS
Source: PubMed Central journal article supplement (PMC7919790; doi:10.3390/antiox10020297), 2021-02-16
Supplement: antioxidants-10-00297-s001.pdf [file antioxidants-10-00297-s001.pdf]

Supplementary Material

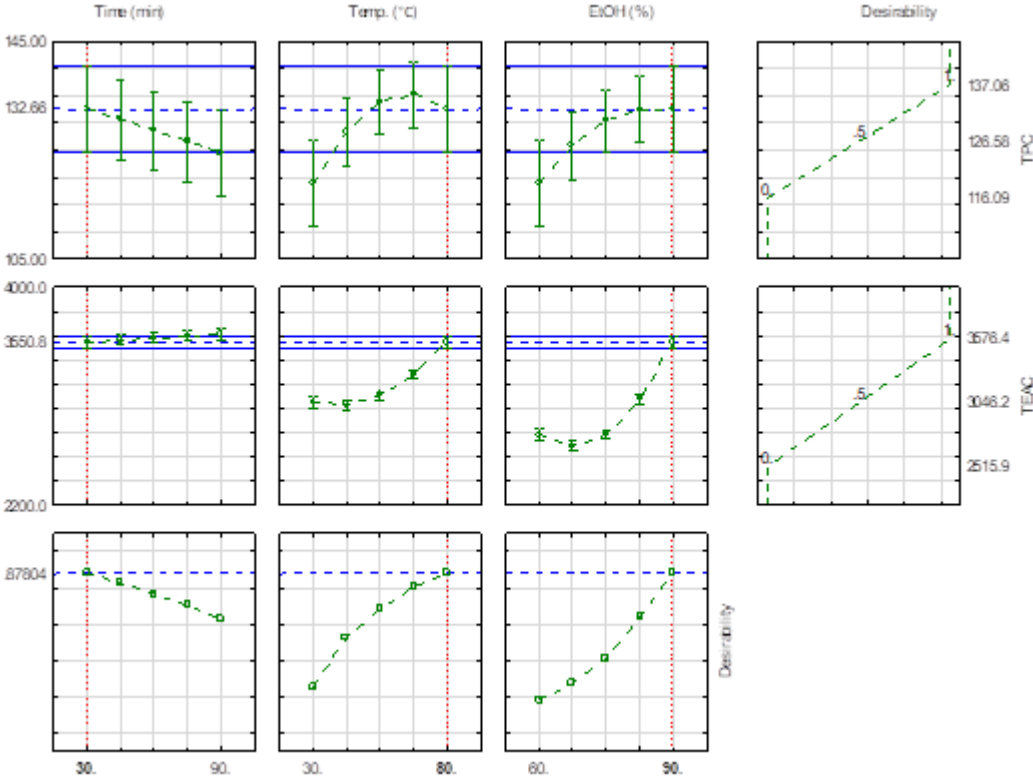

**Figure S1.** Response surface plot showing the combined effect of temperature (°C) (a), time (min) (b), and EtOH (%) (c) on the TEAC of Brazilian Red Propolis extracts.
